# Supplementary material
Source: publisher figshare collection journal article supplement (https://acs.figshare.com/ndownloader/files/3601386)
Supplement: Supplementary file 1 [file 3601386]

## SUPPORTING INFORMATION

# Digital encoding of cellular mRNAs enables precise and absolute gene expression measurement by single-molecule counting

Glenn K Fu\*, Julie Wilhelmy, David Stern, Christina Fan & Stephen P A Fodor\*

Cellular Research Inc., 3183 Porter Drive, Palo Alto, CA 94304, USA

Corresponding Author

\*Email: [gfu@cellular-research.com](mailto:gfu@cellular-research.com) or [sfodor@cellular-research.com](mailto:sfodor@cellular-research.com). Tel: (+1) 650 7526144

Contents:

Experimental methods

Supporting information references

Figures S1 – 7

Table S1, S2, S4

## Experimental methods

### Cell culture and single-cell isolation

Human leukemia K562 cells (ATCC) were grown and maintained in RPMI 1640 culture medium (GIBCO) supplemented with 10% heat inactivated fetal bovine serum (GIBCO) and 1X antibiotic-antimycotic (GIBCO). The cultures were incubated at 37°C in 5% CO<sub>2</sub>. For hemin induction, K562 cells were added to fresh culture media supplemented with 0.05 mM hemin (Sigma-Aldrich) and incubated for 45 - 72 hours. Single cells were washed and isolated by limiting dilution to approximately 1 cell per  $\mu$ L in calcium-magnesium free phosphate buffered saline (GIBCO). One (1)  $\mu$ L of this dilution was added to several 0.2 mL PCR tubes and the presence of a single cell was verified by visual inspection under an inverted microscope. Each single-cell sample was frozen at -80°C until further processing. Prior to cDNA synthesis, 8  $\mu$ L of 0.7% Triton X-100 was added to each cell and the reaction tube was incubated at 65°C for 5 min for cell lysis. The sample was mixed by vortexing and placed on ice.

### RNA samples and controls

Human liver total RNA was purchased from Ambion and human normal lymphocyte total RNA was purchased from Biochain. RNA experiments were carried out using low nucleic acid binding tubes (Ambion) and tips (Rainin). To reduce the non-specific binding even further, each tube was pre-rinsed with a solution of 10 ng/ $\mu$ L yeast RNA (Ambion). All RNA dilutions were performed in a solution of 1 ng/ $\mu$ L *E.coli* total RNA (Roche) as a carrier. Volumes below 5  $\mu$ L were avoided to reduce pipetting errors. For control experiments, a 1.2 kb synthetic Kanamycin polyadenylated RNA (Promega) was used. Control spike-in RNAs for sequencing experiments were a mixture of polyadenylated *B. subtilis* transcripts, *Dap*, *Phe*, *Thr* and *Lys* (Affymetrix).

### Barcode and primer design

Barcodes consist of 21-base oligonucleotide tags (Supporting information, Table S3)<sup>1</sup>. A set of 960 deoxyuridine modified oligo dT primers each containing a distinct barcode tag and a universal PCR binding sequence (AGCACGACAGACGCCTGAT), was synthesized and pooled in equimolar concentration (Cellular Research). A second strand (SS) cDNA synthesis primer was selected 200 to 500 bp from the 3' end of each mRNA tested. A forward gene-specific PCR primer (F1) was selected 50 to 150 bp downstream of the SS primer. A nested primer (F2) was selected 50 to 150 bp downstream of the F1 primer for the detection reaction. To design primers using the NCBI Primer3 and primer BLAST program (<http://www.ncbi.nlm.nih.gov/tools/primer-blast/>), the reverse complement to the universal PCR binding site was appended to the 3' end of each transcript and the entire sequence was input into the program. Gene-specific forward primers were selected using the universal PCR binding sequence as the reverse primer. Default primer selection parameters were applied except for the following modifications: melting temperatures ranged from 59°C to 65°C, primer GC content ranged from 40 - 60%. One of the

high abundance genes (RPLP0) was assayed in duplicate using an alternate set of primers which resulted in equivalent counts. All gene assays, except for ABCF1, were successful with the initial set of selected primers. Two 4 bp runs of primer dimer pairs were present in the original ABCF1 F1 primer, which when omitted resulted in a successful assay. Although initial experiments included the use of deoxyuridine substitutions on the second strand primer, its use was subsequently found to be unnecessary and has been excluded in later experiments. This optional strategy may be reserved for troubleshooting difficult situations where primer interference with downstream steps is suspected. Genes for multiplex targeted sequencing were chosen from popular human qPCR gene expression assays. Resulting F1 PCR amplicons were 362 to 450 bp in length, and F2 PCR amplicons were 210 to 320 bp in length. All gene IDs and primer sequences are listed (Supporting information, Table S1 and S4).

### **cDNA synthesis and molecular indexing**

Eight (8)  $\mu$ L of sample (isolated RNA or crude cell lysate) was mixed into a tube containing 1  $\mu$ g of *E. coli* carrier total RNA (Roche), 1  $\mu$ L of 10 mM dNTP mix (NEB), 1  $\mu$ L of 4  $\mu$ M SS primer and 1  $\mu$ L of 4  $\mu$ M barcoded oligo-dT primer pool (Cellular Research) and incubated at 65°C for 5 min. The reaction was placed on ice and the following reverse transcription master mix was added: 2  $\mu$ L 10X MMLV buffer (NEB), 10 units SUPERase-In (Ambion), 200 units MMLV reverse transcriptase (NEB) and 2 units Titanium Taq polymerase (Clontech) for a total reaction volume of 20  $\mu$ L. The reaction was incubated at 37°C for 20 min followed by second strand synthesis: 94°C for 2 min, 55°C for 2 min, 68°C for 2 min. To maximize efficiency, this second strand reaction is repeated twice. The high annealing temperature of the second strand reaction (55°C) prevents un-intended excess barcode incorporation ( $dT_{17}$   $T_m$  = 44°C). This procedure copies deoxyuridines on the barcoded dT primer into adenines on the second strand cDNA. All of the above reactions occur in a single tube by modulating temperature, and do not require additional pipetting steps. The reverse transcription reaction contains both the reverse transcriptase enzyme and the thermophilic DNA polymerase, but the latter is initially inactivated by antibody binding and is not active during the cDNA synthesis step. After heat inactivation of the mesophilic reverse transcriptase, the DNA polymerase is hot-start activated and begins to carry out second strand synthesis. To inactivate excess primers, 2.5 units of Uracil DNA Glycosylase (UDG) (NEB) were added and the reaction was mixed and transferred to a new tube and incubated at 37°C for 15 min. No purification procedure is necessary because abasic primers are prevented from participating and interfering in downstream steps, thereby increasing the specificity and efficiency of those steps.

### **Singleplex mRNA transcript counting**

A 5  $\mu$ L portion of the cDNA reaction was added to a 15  $\mu$ L PCR master mix consisting of 0.75X Titanium Taq buffer, 0.15  $\mu$ M dNTP mix, 0.05  $\mu$ M gene specific F1 primer, 0.05  $\mu$ M universal reverse primer and 0.75X Titanium Taq DNA polymerase. The reaction was incubated at 94°C for 2 min, followed by 30 cycles of: 94°C for 20 sec, 58°C for 20 sec, 68°C for 20 sec; followed by 68°C for 4 min. One (1)  $\mu$ L of the

PCR product was added into a 50  $\mu$ L detection reaction consisting of 1X Taq buffer (NEB), 0.2 mM dNTP mix, 0.2  $\mu$ M gene specific F2 primer, 0.2  $\mu$ M Tye-563 labelled universal reverse primer and 2.5 units Taq DNA polymerase (NEB). The reaction was incubated at 94°C for 2 min, followed by 30 cycles of: 94°C for 20 sec, 55°C for 20 sec, 72°C for 20 sec; followed by 72°C for 4 min. Four (4)  $\mu$ L of the product was analyzed on a polyacrylamide 4-20% gradient TBE gel (Invitrogen) to assess size and purity.

### **Multiplex mRNA transcript counting**

To simultaneously assay multiple genes in a single reaction, the molecular indexing PCR protocol was performed with the following changes: Primers for all genes were combined and used together in each step. The annealing step in the first amplification reaction was extended from 20 sec to 90 sec. After multiplex PCR, detection reactions for individual genes were then performed independently in separate F2 PCR reactions.

### **Imaging system**

The PIXEL instrument (Cellular Research) is an automated fluorescence imaging system for 16-well slides (Figure 1B-C). The imaging optical train consists of an achromatic cemented doublet lens (85 mm focal length, Edmund Optics 47640), an emission bandpass filter (Semrock FF01-593/40-25), a camera lens (25 mm focal length, Fujinon HF25HA-1B), and a 1.2-megapixel CCD camera (Point Grey Research CMLN-13S2M-CS). CCD size is 4.8 mm x 3.6 mm, of which the central 4.8 mm x 2.4 mm area is used. The magnification of the imaging optical train is 0.3. Therefore the instrument's field of view is 16 mm x 8 mm, and two adjacent wells of a 16-well slide can be imaged simultaneously. Exposure time for fluorescence images is typically 1 sec. Fluorescence excitation is provided by an off-axis (45 degree incidence) Kohler illuminator consisting of a 525 nm, 10 watt LED (LedEngin LZ4-40G100), an aspheric collimating lens (20 mm focal length, Thorlabs ACL2520-A), a rectangular aperture (19 mm x 7.5 mm), a bandpass filter (Semrock FF01-531/40-25), and three plano-convex lenses (60 mm focal length, Edmund Optics 47347). The 16-well slide is mounted on a single-axis motorized translation stage constructed from a stepping-motor-driven linear actuator (Haydon Kerk Z26441-05-151ENG) and a linear slide with recirculating ball bearings (Misumi SSELBW9-170).

### **Barcode detection and counting**

Barcode detectors (Cellular Research) were constructed by inkjet printing of 5' Amine modified oligonucleotides of complementary sequence to the oligo dT barcodes onto epoxysilane coated glass slides or plates. Sixteen (16) or 96 well chambers were applied to partition samples for hybridization. Dye labelled PCR product was added to an 80  $\mu$ L solution of 100 pM Cy3 hybridization control oligo (Cellular Research) in Wash A buffer (Affymetrix) and incubated at 95°C for 5 min then placed on ice. The denatured PCR product was transferred into a well chamber on the detector slide for incubation at 37°C for 3 hrs followed by a single rinse in Wash B buffer (Affymetrix) at room temperature. The remaining

liquid was vacuum aspirated and the detector was either imaged on the FLAIR scanner (Sensovation AG) or the PIXEL instrument (Cellular Research). For each image, a detection threshold is computed to classify barcodes as either present or absent. The algorithm applies a lower (LL) and upper (UL) intensity threshold limit, and  $w$ , a window size. Each was set to default values that were determined from a reference experimental dataset. We let  $y = [y_1, y_2, \dots, y_n]$  represent the set of  $n$  background subtracted probe intensities where each  $y$  satisfies  $LL \leq y \leq UL$ , and sort the intensities in increasing order to obtain  $y^* = [y_{(1)}, y_{(2)}, \dots, y_{(n)}]$ . The distance between each neighboring sorted probe intensity,  $d = [d_1, d_2, d_i, \dots, d_{n-1}]$  is calculated, where  $d_i = y_{i+1}^* - y_i^*$ . We then calculate a corresponding threshold statistic for each of the distances,  $d$ :

$$x_j = \frac{\sum_{i=j-w}^{j+w} d_i}{2w+1} \quad \text{Equation 1}$$

The threshold  $C$  is the probe intensity corresponding to the largest  $x_j$  statistic, i.e.  $y_{j\_max}$ , where  $j\_max$  corresponds to  $x_{j\_max} = \max(x_j)$ . The number of barcodes detected,  $k$ , corresponds to probes with intensities greater than the threshold  $C$ . Once  $k$  is determined, we can compute the number of molecules measured as described previously<sup>2</sup>.

### Barcode counting by sequencing

Poly-A RNA containing Dap, Lys, Phe and Thr controls (Affymetrix) was diluted  $1:1 \times 10^8$  into 0.3 fg per  $\mu\text{L}$  Kan control RNA (Promega). One (1)  $\mu\text{L}$  was added to 5 – 20 pg of various human total RNA samples mixed with 0.5  $\mu\text{g}$  *E. Coli* RNA (added as a carrier) in each of 96 PCR plate wells. Five (5) nMoles of dNTP and 2 pMoles of barcoded oligo-dT primers were added into a final volume of 4.9  $\mu\text{L}$  and reactions were incubated at  $65^\circ\text{C}$  for 3 min and then placed on ice. Two (2)  $\mu\text{L}$  water, 0.5  $\mu\text{L}$  0.1M DTT, 2  $\mu\text{L}$  5X first strand buffer, 2 units SUPERase-In (Life) and 60 units MMLV (NEB) were added and the reactions were incubated at  $37^\circ\text{C}$  for 30 min and  $65^\circ\text{C}$  for 20 min. One (1)  $\mu\text{L}$  of 2  $\mu\text{M}$  each of pooled F1 primers, 1  $\mu\text{L}$  of 2  $\mu\text{M}$  sample indexing primer and 0.2  $\mu\text{L}$  of Titanium Taq DNA polymerase (Clontech) were added and the reactions were incubated at  $94^\circ\text{C}$  for 2 min,  $55^\circ\text{C}$  for 3 min and  $68^\circ\text{C}$  for 2 min, and repeated for 2 more cycles. All 96 reactions were then pooled into a single tube, and 20 units of UDG (Affymetrix) was added and incubated for 30 min at  $37^\circ\text{C}$ . One (1) mL AMPure beads (Beckman Coulter) was added to purify the cDNAs, and air-dried beads were re-suspended in 250  $\mu\text{L}$  of multiplex PCR reaction containing 1X Titanium Taq PCR buffer, 0.3 mM dNTPs, 50 nM each of pooled F1 primer, 1  $\mu\text{M}$  iL\_B\_PCR reverse primer (Cellular Research) and 5  $\mu\text{L}$  of Titanium Taq polymerase. PCR was carried out in 5 tubes of 50  $\mu\text{L}$  each for  $94^\circ\text{C}$  2min, and 15 cycles of  $94^\circ\text{C}$  for 30 sec,  $55^\circ\text{C}$  for 3 min,  $68^\circ\text{C}$  for 1 min; and  $68^\circ\text{C}$  for 7 min. An equal volume of AMPure was added to purify the PCR product, and DNA was eluted in 40  $\mu\text{L}$  10 mM Tris-HCl, pH 8. Ten (10)  $\mu\text{L}$  was used for a nested PCR in 100  $\mu\text{L}$  of 1X Titanium PCR buffer, 50 nM of each F2 primer, 1  $\mu\text{M}$  of iL\_B\_PCR primer and 2  $\mu\text{L}$  of Titanium Taq polymerase. PCR condition was the same as above, except only 12 cycles were used, and products were purified as before. To prepare for sequencing, 5  $\mu\text{L}$  purified product was amplified by PCR in 100  $\mu\text{L}$  1X Taq PCR buffer, 0.2 mM dNTPs,

0.2  $\mu$ M each IDX D0 and P1\_long primers (Cellular Research) and 1  $\mu$ L Taq polymerase (Affymetrix). PCR conditions were 94°C for 2 min, 3 cycles of 94°C for 15 sec, 52°C for 30 sec, 72°C for 30 sec; and 11 cycles of 94°C for 15 sec, 60°C for 30 sec, 72°C for 30 sec; followed by 72°C for 7 min. Products were purified with an equal volume of AMPure. Sequencing was performed on the Illumina MiSeq instrument. Reads were mapped to the 960 oligo-dT barcodes and to the 96 gene targets and 4 spike-in controls using BWA<sup>3</sup> or Bowtie 2<sup>4</sup>. No read minimums were applied as inclusion criteria for counting barcodes. A bash script was used to count the number of barcodes detected in the sequencing reads for each gene.

### **RNA-Seq analysis of bulk RNA sample**

cDNAs were generated using the Illumina mRNA-Seq sample preparation kit through the polyadenylation step before using the NEXTflex qRNA-Seq kit (Cellular Research) to prepare sequencing libraries. Five hundred (500) ng of human normal lymphocyte total RNA was used as starting material and External RNA Controls Consortium (ERCC) RNAs (Ambion) were spiked into the input RNA sample to serve as an internal control. DNA sequencing was performed on a MiSeq instrument and paired-end reads were mapped using BWA to the HG19 Refseq RNA sequences downloaded from the UCSC Genome Browser (<http://genome.ucsc.edu>). RPKM values were calculated following published methods<sup>5</sup>.

### **Determination of Template Switching cDNA synthesis efficiency**

Synthetic poly-adenylated RNAs were used as input for strand switch cDNA synthesis<sup>6</sup>. Each 1,092 nt RNA molecule contains one of 960 possible 21 nucleotide molecular barcode tags between positions 728 – 748 (Supporting Information, Figure S6). Ten-fold serial dilutions of the barcoded RNA was reverse transcribed in 20  $\mu$ L in 1 mM dNTP, 1  $\mu$ M T20KanR1 RT primer, 1  $\mu$ M Template switch oligonucleotide (TGACTGGAGTTCAGACGTGTGCTCTTCCGATCTNNNNNNNNNNACGCGrGrG), 50 mM Tris-HCl pH 8.3, 6 mM MgCl<sub>2</sub>, 75 mM KCl, 5 mM DTT, 0.1 mg/ml BSA, 1 unit SUPERaseIn and 200 units SuperScript II (Life technologies) for 42°C for 90 min and inactivated at 70°C for 15 min. cDNAs were purified by Ampure XP Beads after TS and one-tenth of the cDNA was PCR amplified with either forward + reverse gene-specific primers, or strand switch primer + reverse gene-specific primer (Supporting Information, Figure S6). Amplification reactions were performed in 20  $\mu$ L in 0.2 mM dNTP, 0.2  $\mu$ M each primer, 1 unit Taq DNA polymerase in 1X PCR buffer (Affymetrix) for 30 cycles. Nested PCR was performed using a Cy3 labeled forward primer and a nested gene-specific primer, and barcodes were detected and counted as described.

## Supporting Information Figures

### A

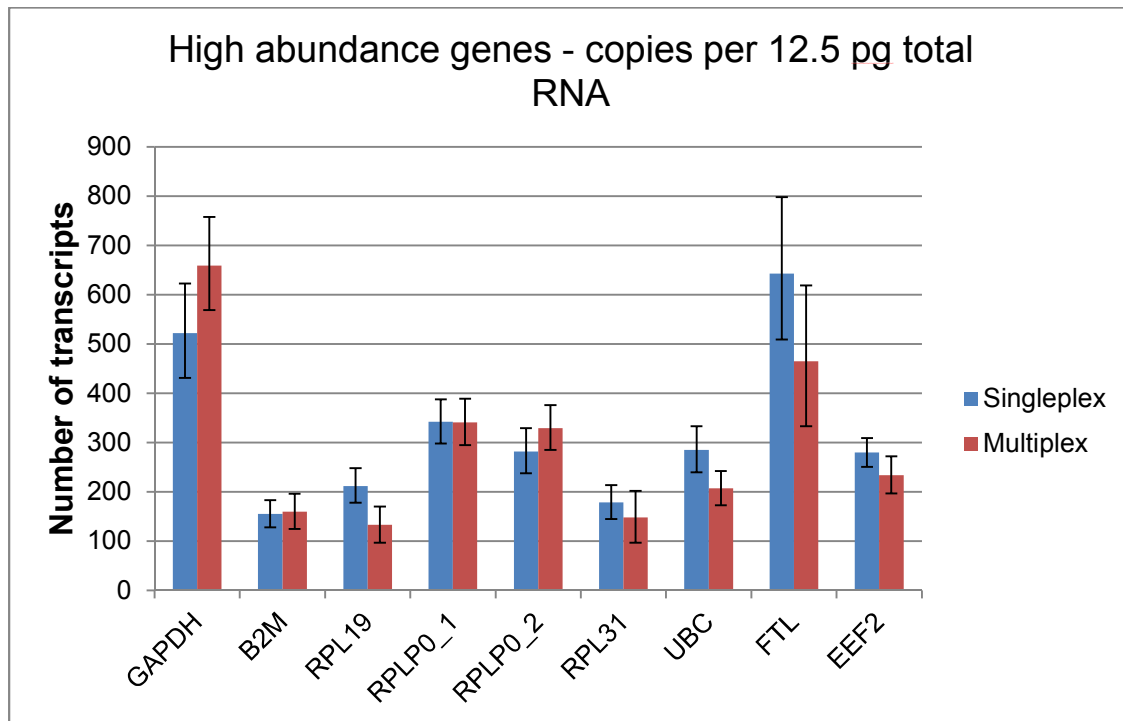

### B

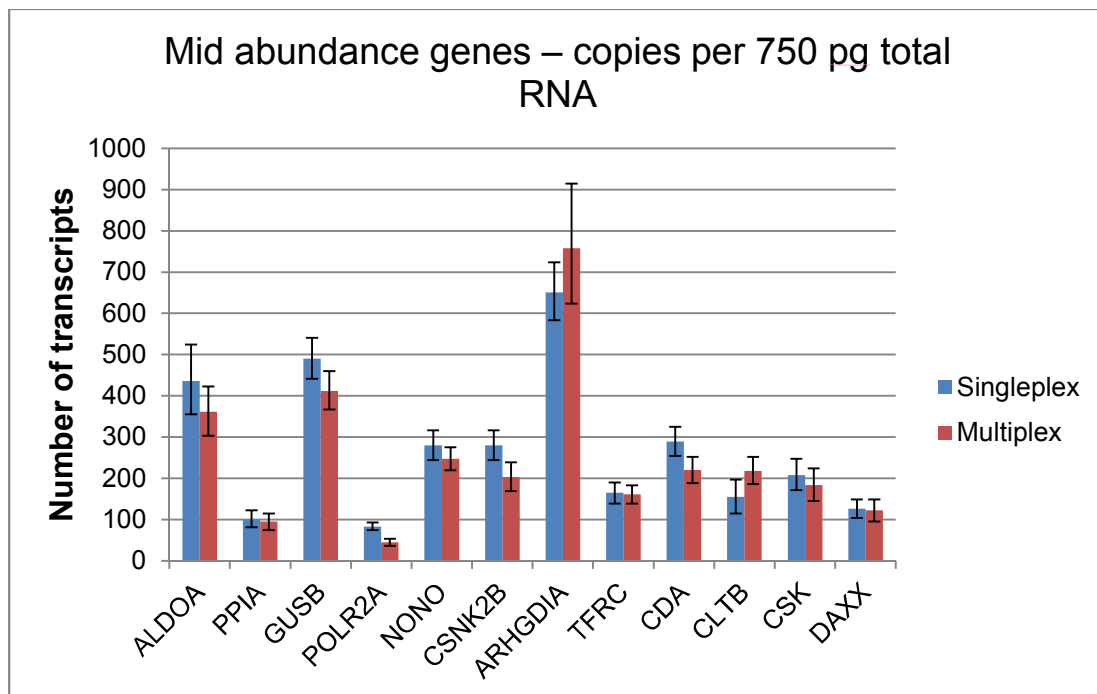

C

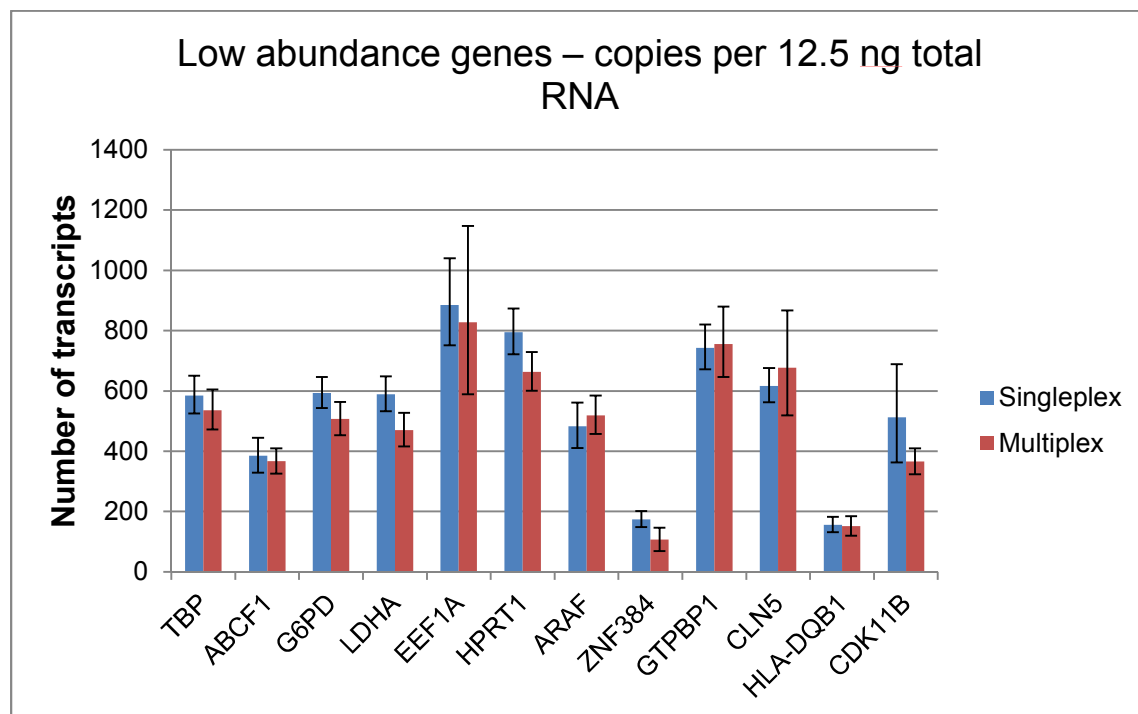

**Figure S1.** Singleplex (blue bars) and multiplex (red bars) molecular indexing PCR was performed on sets of high (a), medium (b) and low (c) abundance genes. In singleplex assays, one gene was amplified and measured at a time. In multiplex assays, all genes were amplified together before the detection of individual genes. Increasing amounts of liver total RNA was used in each experiment as indicated. Error bars show the 95% confidence intervals of the measurements.



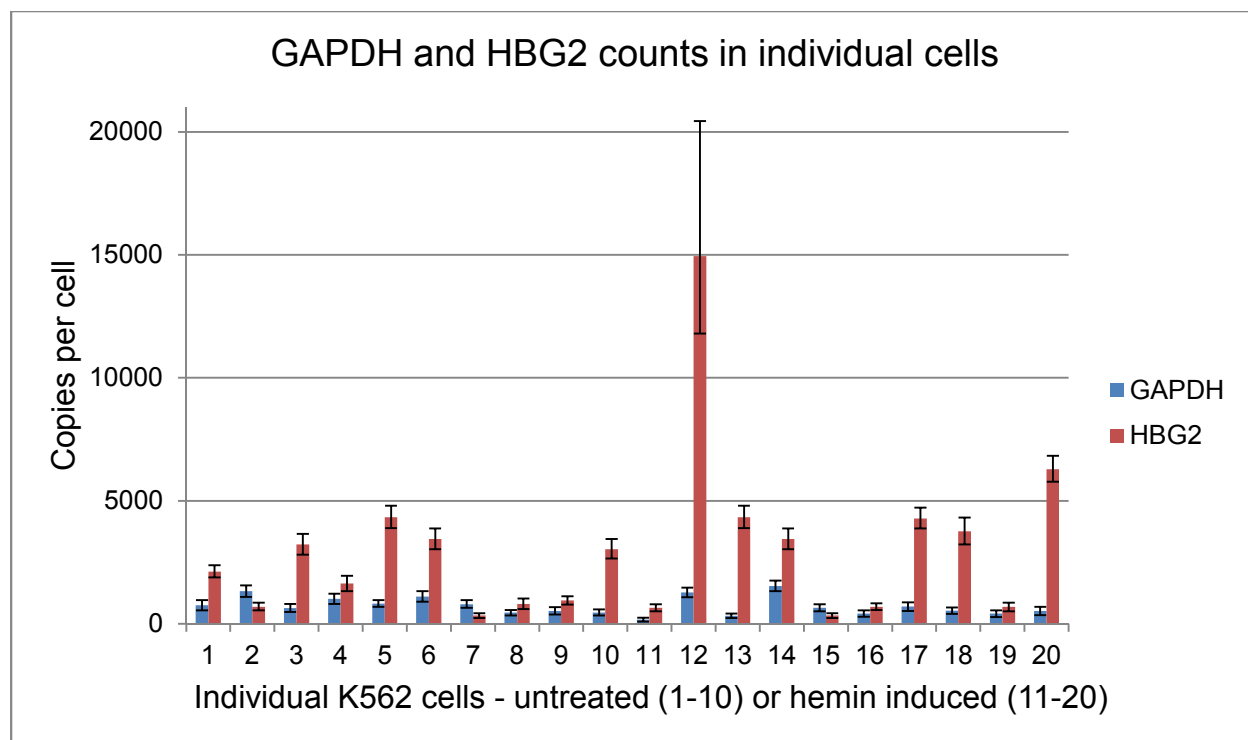

**Figure S2.** Direct gene expression measurements in single cells. K562 cells were grown either without, or with hemin treatment to induce HBG2 expression. Ten individual cells from each condition were picked into PCR tubes and lysed for measurements of GAPDH (blue bars) and HBG2 (red bars) expression levels. The absolute transcript copies detected in each cell is shown in the chart. Error bars indicate 95% measurement confidence intervals.

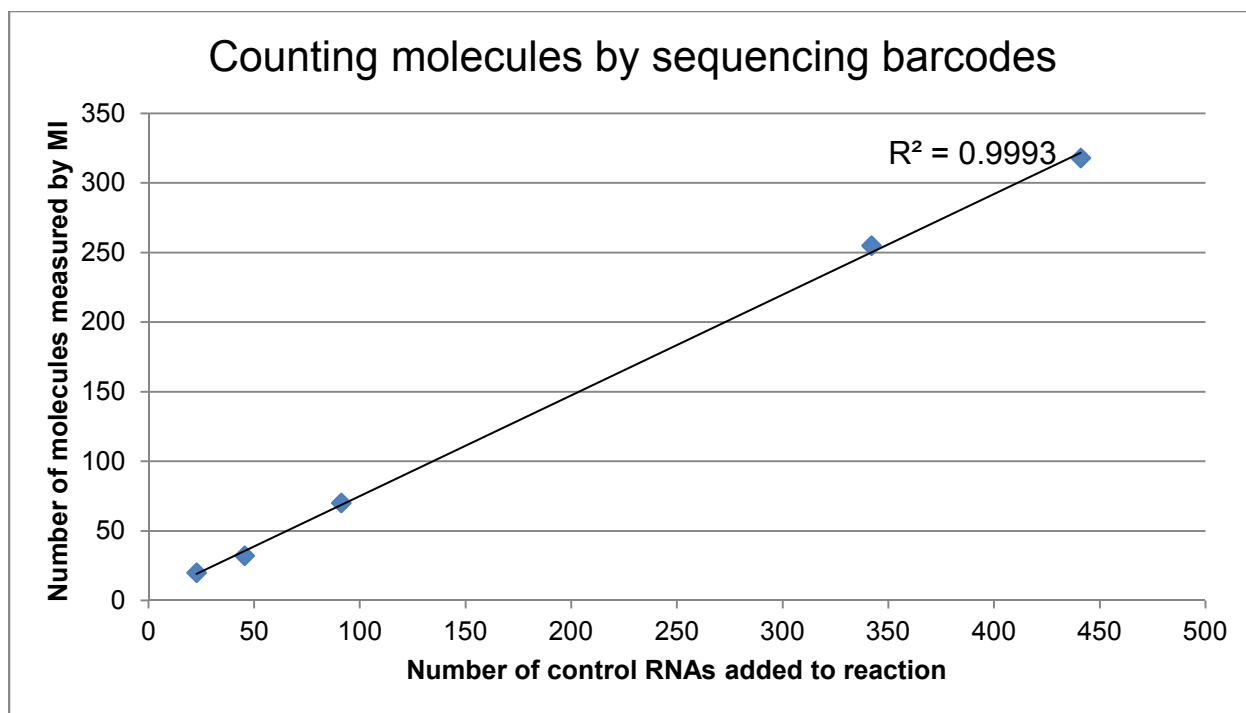

**Figure S3.** Average measured number of copies of control RNAs added to each of 96 molecular indexing reactions determined by counting barcodes in sequenced reads. Details are shown in Figure S5.

Step 1 : RT; molecular indexing + sample barcoding in 96 wells

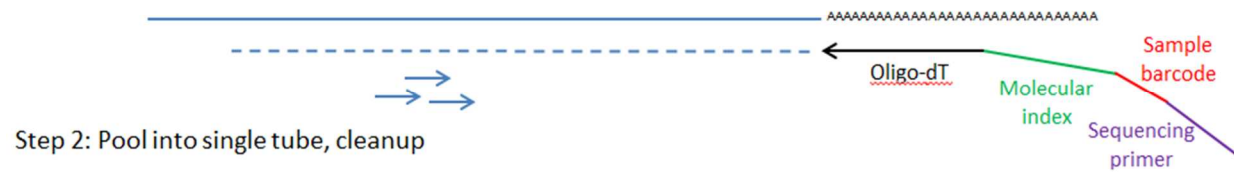

Step 3 : Multiplex PCR

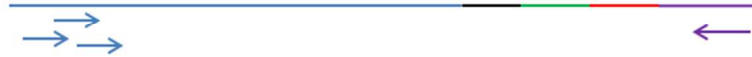

Step 4 : Nested multiplex PCR

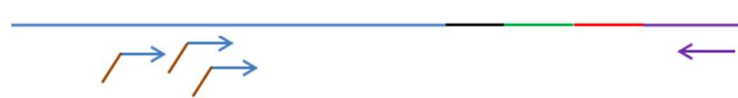

Step 5 : Sequencing

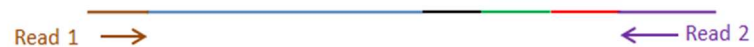

**Figure S4.** Workflow for combining sample barcoding with molecular indexing. 8 nt barcodes are added to identify pooled cDNAs from samples in a 96 well plate. After reverse transcription, samples are pooled into a single tube, and excess primers are inactivated by UDG treatment and purified using Ampure. Multiplex PCR is applied to amplify cDNAs for 96 genes and 5 spike-in controls, followed by nested PCR to add sequencing priming sites. PCR products are sequenced on the Illumina MiSeq instrument.

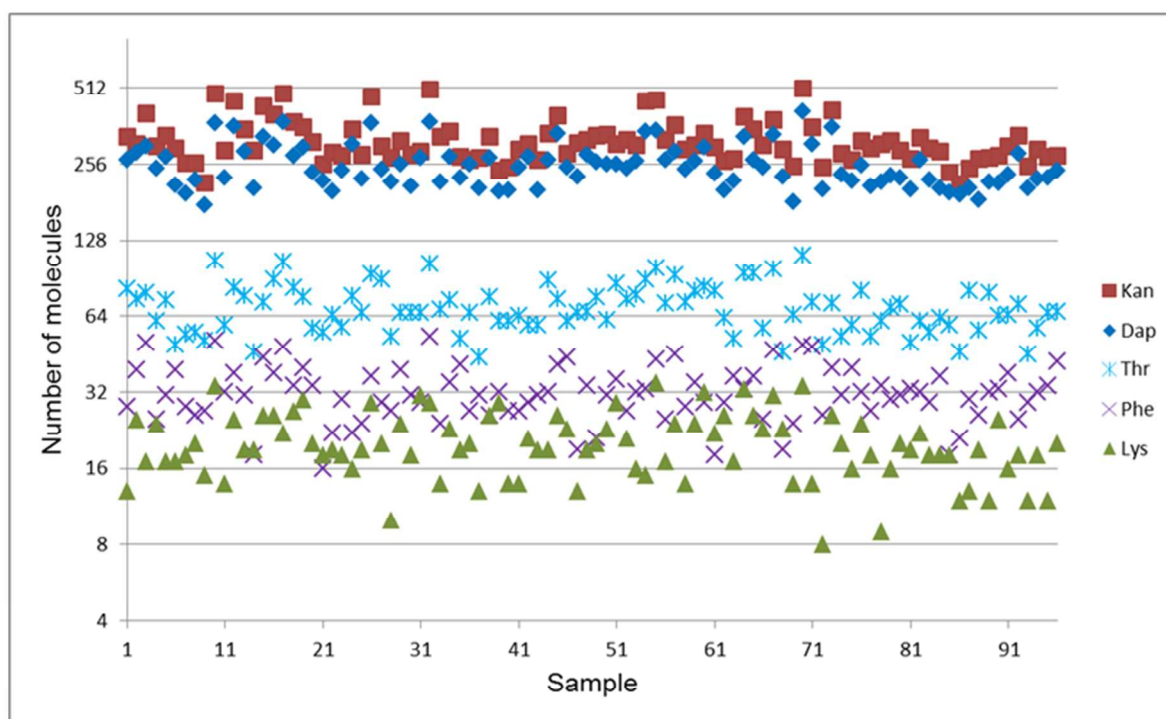

| Control | Input # RNA | Average # detected | Sensitivity | StDev | CV    |
|---------|-------------|--------------------|-------------|-------|-------|
| Kan     | 441         | 318                | 72.1%       | 64.5  | 20.3% |
| Dap     | 342         | 255                | 74.6%       | 51.4  | 20.2% |
| Thr     | 91          | 70                 | 76.8%       | 15.4  | 22.0% |
| Phe     | 46          | 32                 | 70.2%       | 8.0   | 25.0% |
| Lys     | 23          | 20                 | 87.7%       | 6.0   | 30.0% |

**Figure S5.** Absolute counts of molecules for 5 spike-in RNA controls across 96 reactions. Plot above shows the number of molecules detected in sequencing, and the table below shows the number of molecules added per well for each control. Detection sensitivity is expressed as the average number of cDNA molecules detected divided by the number of RNA molecules added.

## Measurement of cDNA conversion and TS efficiency

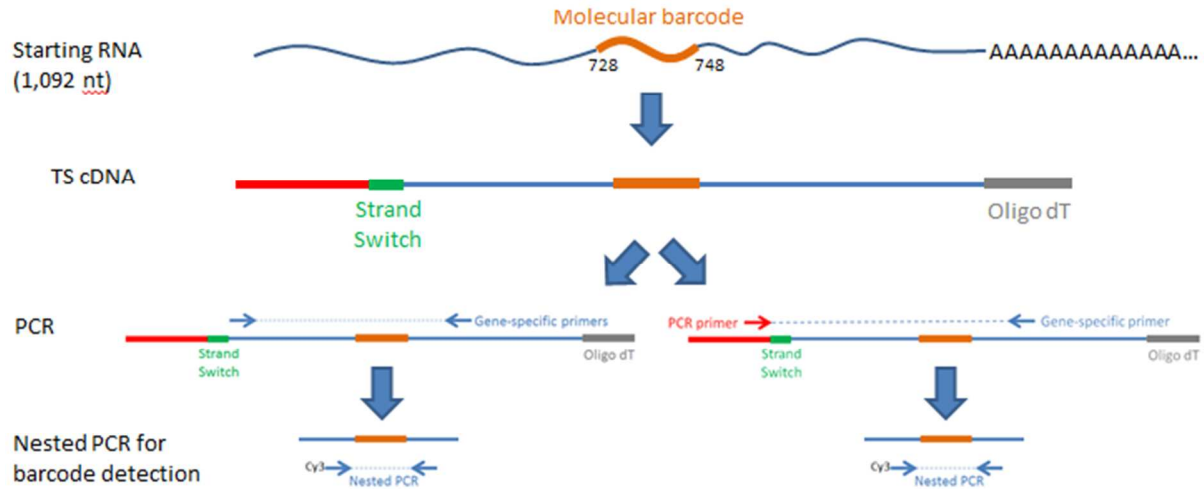

| Input no. of RNAs | No. of cDNAs detected | RT efficiency | No. of TS cDNAs detected | RT + TS efficiency |
|-------------------|-----------------------|---------------|--------------------------|--------------------|
| 0                 | 0                     | NA            | 0                        | NA                 |
| 8                 | 0                     | 0.00%         | 0                        | 0.00%              |
| 80                | 13                    | 16.36%        | 3                        | 3.76%              |
| 800               | 65                    | 8.15%         | 9                        | 1.13%              |
| 8000              | 745                   | 9.31%         | 126                      | 1.57%              |

**Figure S6.** Measurement of Template Switching (TS) efficiency. Barcoded synthetic RNAs were used as input for reverse transcription and TS. cDNAs synthesized were split and either amplified by PCR using a pair of gene-specific primers (left panel) or using the primer incorporated by TS (right panel). Barcodes were counted by nested PCR with dye labelled primers followed by hybridization detection. RT efficiency is calculated as the number of cDNA molecules detected divided by the number of input RNA templates used. The combined efficiency of RT and TS is calculated by dividing the number of resulting cDNAs containing the strand switch oligo with the number of input RNAs.

GGGAGAAATACAAGCTTGGGCGTGTCTCAAAATCTCTGATGTTACATTGCACAAGATAAAAAATATATCATCATGAA  
CAATAAAACTGTCTGCTTACATAAACAGTAATACAAGGGGTGTTATGAGCCATATTCAACGGGAAACGTCTTGCTC  
GAGGCCGCGATTAAATCCAACATGGATGCTGATTTATATGGGTATAAATGGGCTCGCGATAATGTCGGGCAATC  
AGGTGCGACAATCTATCGATTGTATGGGAAGCCGATGCGCCAGAGTTGTTTCTGAAACATGGCAAAGGTAGCGT  
TGCCAATGATGTTACAGATGAGATGGTCAGACTAACTGGCTGACGGAATTTATGCCTCTCCGACCATCAAGCAT  
TTTATCCGTACTCCTGATGATGCATGGTTACTCACCCTGCGATCCCCGGGAAAAACAGCATTCCAGGTATTAGAAG  
AATATCCTGAGTCAGGTGAAAATATTGTTGATGCGCTGGCAGTGTTCTGCGCCGGTTGCATTTCGATTCTGTTTGT  
AATTGTCCTTTTAACAGCGATCGCGTATTTCTGCTCGCTCAGGCGCAATCACGAATGAATAACGGTTTGTTGATGC  
GAGTGATTTTGATGACGAGCGTAATGGCTGGCCTGTTGAACAAGTCTGGAAAGAAATGCATAAGCTTTTGCCATTC  
TCACCGGATTCAGTCGGCGCGCCAGCACGACAGACGCCTGATAxxxxxxxxxxxxxxxxxxxxxxxxGCCTGCGAGCGGCCG  
CGATGTTGGACGAGTCGGAATCGCAGACCGATACCAGGATCTTGCCATCCTATGGAACTGCCTCGGTGAGTTTTC  
TCCTTCATTACAGAAACGGCTTTTTTCAAAAATATGGTATTGATAATCCTGATATGAATAAATTGCAGTTTCATTGAT  
GCTCGATGAGTTTTTCTAATCAGAATTGGTTAATTGGTTGTAACTGGCAGAGCATTACGCTGACTTGACGGGAC  
GGCGGCTTTGTTGAATAAATCGAACTTTTGCTGAGTTGAAGGATCAGATCACGCATCTTCCCGACAACGCAGACCG  
TTCAAAAAAAAAAAAAAAAAAAAAA

**Figure S7.** Sequence of the barcoded spike-in RNA.

Notes:

xxxxxxxx represents 21 nt barcode

Reverse transcription primer:

T20KanR1      TTTTTTTTTTTTTTTTTTGGAACGGTCTGCGTTGTC

Gene-specific primers:

RseqQCKF1      ATTCTACCGGATTTCAGTCG

RseqQCKR1      CGAGGCAGTTCCATAGGATG

Nested Primers:

Cy3PCR004      /5Cy3/ATTATGAGCACGACAGACGCCTGAT

RseqQCKR2      ATGGCAAGATCCTGGTATCG

**Table S1. PCR primers for targeted cDNA sequencing.**

| <b>Name</b> | <b>F1 Sequence</b>        | <b>F2 Sequence</b>          |
|-------------|---------------------------|-----------------------------|
| NM_144646.3 | TTGACTTTGCCTTGGAGAGC      | ATATTTGGACATAACAGACTTGGAA   |
| NR_015342.1 | TTTTTCTTACAGTGTCTTGGCATA  | TGCTGACTTTTAAAATAAGTGATTCCG |
| NM_000193.2 | CGTGACCCTAAGCGAGGAG       | GCGGCAGAGTAGCCCTAAC         |
| NM_001777.3 | TTTGCAGTGATTTGAAGACCA     | TGGGCTATTTCTATTGCTGCT       |
| NM_000600.3 | GGCATTCTTCTTCTGGTCA       | AATGGAAAGTGGCTATGCAG        |
| NM_021127.2 | CTGGGCTATATACAGTCCTCAAA   | GGTTGTAGTCACTTTAGATGGAAAA   |
| NM_004318.3 | GGGGTGATTATGACCAGTTGA     | TTTGTTTGACTTTGAGCACCA       |
| NM_002467.4 | TGCATGATCAAATGCAACCT      | AATGTTTCTCTGTAAATATTGCCATT  |
| NM_001773.2 | TCTTCCGAAAAATCCTCTTCC     | CACCCCCATATGGTCATAGC        |
| NM_001770.5 | CTGGGGTCCCAGTCCTATG       | AGCACCAGGTGATCCTCAG         |
| NM_001718.4 | TGTACTGGGAAGGCAATTTCA     | TGTTTTGCTGTAACATTGAAGGA     |
| NR_023920.1 | GAGCCGCTGGGGTACTC         | TAATGCCACAGTGGGGATG         |
| NM_000267.3 | CAGTTAGTTGCTGCACATGGA     | GGGCCTAAACTTTGGCAGTT        |
| NM_000633.2 | TTGCATTTCTTTTGGGAAG       | TTTTACCTTCCATGGCTCTTTT      |
| NM_000314.4 | GTCATGCATGCAGATGGAAG      | GCCTTACTCTGATTCAGCCTCTT     |
| NM_021151.3 | GCTGCAGTGAGCTGTGATGT      | CGTAACAAAATTCATTGTGGTGT     |
| NM_002415.1 | GTTCTCTCCGAGCTCACC        | AGAACCGCTCCTACAGCAAG        |
| NM_004985.3 | TCCGAAAGTTTCCAATTCCA      | GTGCTTTCTTTTGTGGGACA        |
| NM_005375.2 | TTGTTTGGGAGACTCTGCATT     | GGGAGTTCTGCATTTGATCC        |
| NM_000555.3 | GACCCCACTTGGACTGGTAG      | TGGGTCAGAGGACTTCAAGG        |
| NM_001668.3 | GTGATCTTGATTGCGGCTTT      | AGGGTTCTGATCACATTGCAC       |
| NM_025237.2 | GGGGGAAAACTACAAGTGC       | CTGCAGGACTGGTCGTTTTT        |
| NM_021117.3 | TGATTCCTTTTCTGCCTGT       | AGGGCAGGGTAGAGAGGGTA        |
| NM_016316.2 | AAAAACCTCCAGGCCAGACT      | TTCTTCCATGCGGAGAAATC        |
| NM_021975.3 | AATCAAAATAACGCCCCAGA      | CATGGCTGAAGGAAACCAGT        |
| NM_004333.4 | TTGCTAAAAATTGGCAGAGC      | TTGCCAGCTATCACATGTCC        |
| NM_001621.4 | TTGTTAAGTGCCAAACAAAGGA    | TCTTTTCCTGTACCAGGTTTTTC     |
| NM_005239.5 | AAGCTGGGAAGAGCAAAGC       | TGACTGGGAACATCTTGCTG        |
| NM_000485.2 | AGGACAGAGGGTGGTCGTC       | TGGCACCTGTACCCTTCTTC        |
| NM_004048.2 | TGAGTGCTGTCTCCATGTTTG     | TTCAATCTCTTGCACTCAAAGC      |
| NM_001657.2 | CCTCACAGCTGTTGCTGTTATT    | TGGAGTCACTGCCAAGTCAT        |
| NM_012238.4 | AAAACACCCAGCTAGGACCA      | TTTGCATGATGTTTGTGTGC        |
| NM_002055.4 | AACTGAGGCACGAGCAAAGT      | GCACCCACTCTGCTTTGACT        |
| NM_002392.4 | GCTTTATGGGTGGATGCTGA      | ACCATGTAGCCAGCTTTCAA        |
| NM_001625.3 | ATAATATCGCCAGCCTCAGC      | GCAACTGGGCATGAGTACCT        |
| NM_002110.3 | TCCAGAGTGTGCTGGATGAC      | CCACACCCCTTCTACTC           |
| NM_002943.3 | TGCAAGCCATTTATGGGAAT      | AGTCTGCTTATTTCCAGCTGTTT     |
| NM_000059.3 | TGGAATGAGGTCTCTTAGTACAGTT | TCCTGTTCAAAAGTCAGGATGA      |
| NM_018136.4 | TCCCAGAAACACCTGTAAGGA     | AAATCACAAATCCCCTGCAA        |
| NM_003467.2 | TGTCTAGGCAGGACCTGTGG      | CTGAACATTCCAGAGCGTGT        |
| NM_004958.3 | AGTGATGCTGCGACTCACAC      | CAGTGGGACCACCCTCACT         |

|                |                             |                         |
|----------------|-----------------------------|-------------------------|
| NM_006139.3    | GGCTCAGAAAGTCTCTCTTTCC      | TCTGTAGATGACCTGGCTTGC   |
| NM_002693.2    | CTCCCAAACCTCAGGCTTTCA       | TCAGAACCAAGATGCCAACA    |
| NM_001080432.2 | AAAGCGCTGGGATTACAGG         | CATGACCCAGCCTATGGTTT    |
| NM_005954.2    | CGTCCAGTTGCTTGGAGAAG        | ACCTCCTGCAAGAAGAGCTG    |
| NM_024865.2    | AATAACCTTGGCTGCCGTCT        | TTGGGAGGCTTTGCTTATTTT   |
| NM_001905.2    | GGGAATTCTCAGTGCCAACT        | CTGGGAAACACTCCTTG CAT   |
| NM_002046.4    | GCATCCTGGGCTACACTGAG        | CAACGAATTTGGCTACAGCA    |
| NM_002253.2    | TGCTGGGAACAATGACTATAAGA     | CAAAGGTCATAATGCTTTCAGC  |
| NM_002356.5    | GCCTAAAACACTTTGGGTGGT       | TTTGACGTATCTTTTCATCCAA  |
| NM_000189.4    | GGGTGCCCACAAAATAGAGA        | TGTTGTTGGTTTCCAAAAAGG   |
| NM_000546.5    | GAGACTGGGTCTCGCTTTGT        | GCCAACTTTTGCATGTTTTG    |
| NM_152860.1    | TGGGGAAGGCTTTCTCTAGG        | CCCAAGCTGATCTGGTGGT     |
| NM_016231.4    | TTCAACTTGAGTGATCTGAGCTG     | TGCTGTGAAAGAAACAAACATTG |
| NM_000518.4    | TATGGGCAACCCTAAGGTGA        | GCACGTGGATCCTGAGAACT    |
| NM_000905.3    | CGCTGCGACACTACATCAAC        | CCAGCCCAGAGACACTGATT    |
| NM_005038.2    | TGGAGTCTTGCTCTGTCACC        | CACGCCCAGCTAATTTTTGT    |
| NM_000041.2    | ACGAGGTGAAGGAGCAGGT         | CCTGGTGGAAGACATGCAG     |
| NM_005957.4    | CGATGCCTTTGGGTAGAGAG        | TCACACCTGTAATCCCAGCA    |
| NR_002785.2    | ACTGATCGTCCAAGGACTGG        | CAGAGCTCCGCCTCATTAGT    |
| NM_000321.2    | AAAAAGAAATCTGGTCTTGTTAGAAAA | TCCATTTTCATCATTGTTTCTGC |
| NM_152756.3    | TTGAAAAGTGGTAAGGAATTGTGA    | TGGTGTTTGTAGGTCACTGAACA |
| NM_000610.3    | CACCAAGAATTGATTTTGTAGCC     | AACATGGTCCATTACCTTTATG  |
| NR_033314.1    | AAAAATGGGGGAAAATGGTG        | AGAGCGAGACTCCGTCTCAA    |
| NM_017460.5    | CATGGTTGAAACCCCATCTC        | AGTGAGCTGAGATTGCACCA    |
| NR_002196.1    | TTCAAAGCCTCCACGACTCT        | AGACGGCCTTGAGTCTCAGT    |
| NM_000591.3    | GCTGGAACAGGTGCCTAAAG        | GGGAATCCCTTCCTGGTC      |
| NM_000106.5    | CCCTAAGGGAACGACACTCA        | CTTCCTGCCTTTCTCAGCAG    |
| NM_138712.3    | ACCTGCTACAAGCCCTGGA         | TGCAGGTGATCAAGAAGACG    |
| NM_004304.4    | GGATCCCTAAGACCGTGGAG        | GGTTTTGAGCATGGGTTCAT    |
| NM_000754.3    | CCACCTCAGAGGCTCCAA          | CCAGCCCCTCCTATGGAT      |
| NM_000492.3    | TGCTGTATTTTAAAAGAATGATTATGA | AAACTGGGACAGGGGAGAAC    |
| NM_000444.4    | GTAGCTGGGACGCTGGTTTA        | TTTGGGTAGGTGACCTGCTT    |
| NM_002463.1    | ATTCCCTTCCCCCTACAAGA        | TCACTGAACGAATGAGTGCTG   |
| NM_000552.3    | CCTGAGTGCAACGACATCAC        | ACGATGTGCAGGACCAGTG     |
| NM_005430.3    | GGGGGAACCAGCAGAAAT          | AATTTGCACTGAAACGTGGA    |
| NM_003150.3    | GACCTAGGGCGAGGGTTC          | CTGTTGTGGCCCATTAAGAA    |
| NM_000388.3    | AATTCCTGAAGCCAGATCCA        | TTCCCTCCAGCAGTGGTATT    |
| NM_007294.3    | AAAATGTTTATTGTTGTAGCTCTGG   | CACCAGGAAGGAAGCTGTTG    |
| NM_005933.3    | TTTCAAGAGCTCAACAGATGACA     | TTTCCTTGTGTTCTTCCAAGC   |
| NM_002343.3    | GACTGCCCGGACAAGTTTT         | TCGCAGGCATTACTAATCTGAA  |
| NM_000376.2    | GAGAAGGTGCCCCAAAATG         | CTCTGGCTGGCTAACTGGAA    |
| NM_002462.3    | AGCCACTGGACTGACGACTT        | AGAGCCCCACCCTCAGAT      |
| NM_021005.3    | GGAGGACTAGTGAGGGAGGTG       | TGTGCAGAGTTCTCCATCTGA   |



|             |                        |                         |
|-------------|------------------------|-------------------------|
| NM_012343.3 | GGCAAGTGATGTGGCAATTA   | TGCCTGTTACAAATATCAAGGAA |
| NM_001741.2 | GTTGGAGCACCTGGAAAGAA   | TTTCCCTTCTTGCATCCTTC    |
| NM_014417.4 | ATGCCTGCCTCACCTTCAT    | TGTGACCACTGGCATTCAAT    |
| NM_014009.3 | ACAGGGGCACTGTCAACAC    | CTCACACACACGGCCTGTTA    |
| NM_006908.4 | AAAAATCATGTGTTGCAGCTTT | CACTTGACCAATACTGACCCTCT |
| NM_005228.3 | TGCTTTCACAACATTTGCAG   | GTGTGTGCCCTGTAACCTGA    |
| NM_013994.2 | AATGTTTCCTTGTGCCTGCT   | CCACTTCCCCTTGCAGTCT     |
| NM_000639.1 | ATATCCTGAGCCATCGGTGA   | TGTGTGTGTGTGTGTGTGTGT   |
| NM_002701.4 | TTTTGGTACCCAGGCTATG    | TCTCCCATGCATTCAAAGT     |
| NM_000268.3 | ACCCCGTGGCATTACATAAC   | TCTAAGTGTTCTTCACTGACAGG |
| NM_003140.1 | CTTCCAGGAGGCACAGAAAT   | TACTCTGCAGCGAAGTGCAA    |
| NM_000551.3 | CTAACCTGGGCGACAGAGTG   | CCAAGATCACACCATTGCAC    |

**Table S2. Sample barcodes for sequencing.**

TAGCTTGT  
CGATGTTT  
GCCAATGT  
ACAGTGGT  
ATCACGTT  
GATCAGCG  
CAGATCTG  
TTAGGCAT  
GGCTACAG  
CTTGTA CT  
ACTTGATG  
TGACCACT  
TGGTTGTT  
TCTCGGTT  
TAAGCGTT  
TCCGTCTT  
TGTACCTT  
TTCTGTGT  
TCTGCTGT  
TTGGAGGT  
TCGAGCGT  
TGATACGT  
TGCATAGT  
TTGACTCT  
TGCGATCT  
TTCCTGCT  
TAGTGACT  
TACAGGAT  
TCCTCAAT  
TGTGGTTG  
TAGTCTTG  
TTCCATTG  
TCGAAGTG  
TAACGCTG  
TTGGTATG  
TGAAGTGG  
TACTTCGG  
TCTCACGG  
TCAGGAGG  
TAAGTTCG  
TCCAGTCG  
TGTATGCG

TCATTGAG  
TGGCTCAG  
TATGCCAG  
TCAGATTC  
TACTAGTC  
TTCAGCTC  
TGTCTATC  
TATGTGGC  
TTRACTCGC  
TCGTTAGC  
TACCGAGC  
TGTTCTCC  
TTCGCACC  
TTGCGTAC  
TCTACGAC  
TGACAGAC  
TAGAACAC  
TCATCCTA  
TGCTGATA  
TAGACGGA  
TGTGAAGA  
TCTCTTCA  
TTGTTCCA  
TGAAGCCA  
TACCACCA  
TGCGTGAA  
GGTGAGTT  
GATCTCTT  
GTGTCCTT  
GACGGATT  
GCAACATT  
GGTCGTGT  
GAATCTGT  
GTACATCT  
GAGGTGCT  
GCATGGCT  
GTTAGCCT  
GTCGCTAT  
GGAATGAT  
GAGCCAAT  
GCTCCTTG  
GTAAGGTG  
GAGGATGG

GTTGTCGG  
GGATTAGG  
GATAGAGG  
GTGTGTCTG  
GCAATCCG  
GACCTTAG  
GCCTGTTC  
GCACTGTC  
GCTAACTC  
GATTCATC  
GTCTTGGC

**Table S4. cDNA synthesis and PCR primers.**

| Gene      | SS primer                  | F1 primer                 | F2 primer                 |
|-----------|----------------------------|---------------------------|---------------------------|
| GAPDH     | CACATGGCCUCCAAGGAGUAA      | AAGAGAGAGACCCTCACTGCTG    | GTTGCCATGTAGACCCCTTG      |
| B2M       | CTTCCAATTTACATACUCTGCTUAGA | TTGACAGGATTATTGGAAATTTGTT | GGCATGGTTGTGGTTAATCTG     |
| RPL19     | AAGAAGCUCCTGGCUGACC        | GAGGCCCCGAGGTCTAAG        | CCAAGGAGGAAGAGACCAAG      |
| RPLP0_1   | CGAGTCCTGGCCTTGTCTGT       | AAGCCAAGGAAGAGTCGGAGG     | GGAGTCGGACGAGGATATGGG     |
| RPLP0_2   | ACGGGTACAAACGAGTCCTG       | AAGGTTGAAGCCAAGGAAGAGT    | AAGCAACCAACTTAGCCAGTTTT   |
| RPL31     | ACCTCGGGCACTCAAAGAGATT     | GGCTCAACAAAGCTGTCTGGG     | GCGGCTGTCCAGAAAACGTAA     |
| UBC       | ACTCTGCACTTGGTCCTGCG       | TTGGTCCTGCGCTTGAGGGG      | GGGGGTGTCTAAGTTTCCCCTTT   |
| FTL       | TTGGATCTTCATGCCCTGGGT      | CCTTCTGAGCCCAGCGACTT      | GCTTCTGCCTAAGCCTCTCCC     |
| EEF2      | CAGCAGACACGCCCTCTTAGT      | TTTGGGTACATGGCCCGCAG      | TGTCACCATGAGCACCTCCAG     |
| ALDOA     | AGCGAGTCCCTCTTCGTCTCT      | CTTCCCTCGTGACAGTGGTG      | CATCACCTTTCCGGCACAC       |
| PPIA      | CCCTTCTCTGCCACCTTAACA      | TGTCTGGTTCCTTCTGCGTGA     | CAGACCTGAGTGCAAGGTGGA     |
| GUSB      | AGACTGATACCACUGCGUGT       | TTCCACAGCAGCAGAACAAAG     | CCTGGGTTTTGTGGTCATCT      |
| POLR2A    | GGTGTTCCTACTCCTACCCAC      | ATCCTTCCTTGCTGTGGCTT      | GGTAGTTCCTGCTGTGAGTGGT    |
| NONO      | GGACACCCAGGAATGACCCTTT     | CTGACAGTAGCTCTTAGACTCGCC  | GAGCAGTAATGCAGCATCAACCTAT |
| CSNK2B    | GCTCTTCATGGTGCATCCCG       | TGCCCAGGCTCTACGGTTTC      | CCCACCTGTCTGCACTCTTT      |
| ARHGDI1   | GTGCACACATTGCTGAGAGCC      | GGTCTTCGTGTTGTGTCTGCC     | GCCTGTCCCTGCTTCTTTTCTG    |
| TFRC      | CAGACTAGTGACAAGCTCCTGGT    | TGGGCCTTTTGAGGTAAGGA      | GTGCAACAGTGTGGAGATTCCCTG  |
| CDA       | CCCTCCTAGCAACCTGCCTT       | CTGCCCCACCTTTCTTTCTCT     | AGTCTGGACTGCTTCCCCATC     |
| CLTB      | GCTTTGGTCGGGGTGGAGAC       | CAGCCTATTCCACTCCTCCCC     | CTCACGCCTCCTCTCAGTCTAC    |
| CSK       | TTTCCTGTCTGCCCCGTGAG       | GCGCTTGACCATGTTGCACT      | ACCCGCCTTGTGAGATGGAA      |
| DAXX      | GCCTCCTCGGCCTGGTACTT       | TCTGATTAGCTGCCTCCCCTTC    | TTTGGAGGAAGGTGGGAAGCA     |
| TBP       | CCATGAACCACAGUTTTTATAUTTC  | TTCTGTGCCAGACACATTCC      | TGTTAATGAAATGAATGGCTGT    |
| ABCF1     | GGAGATTGAUGGGAGTUGGA       | CTGTTCTCAGTCTTGATTTGCTT   | TTTGCAGTCTTGCTGACAGTG     |
| G6PD      | GTGAGAGAATCUGCCTGUGG       | TCCTTGTCACCAGCAACATC      | ACCCGTAGGCAGCCTCTCT       |
| LDHA      | TGGGCAACCCTGCAACGATT       | GTTGTATTGGTACCACTTCCATTGT | ATCTTGTCCTCTGGAAGCTGG     |
| EEF1A     | AGATGGCCAATAGATGCCCTGAT    | TTCCCACTGGAAGCAGGAATGAG   | CAACTGTGGCTTGAGCACCAC     |
| HPRT1     | TGTCAGTTGCTGCATTCTAAAC     | GTTCCCTTTGGGCGGATTGT      | TGAATCTTTGTCAGCAGTTCCCT   |
| ARAF      | TTTGTGCCTGATGTGCCTTCC      | TTGTGTCTCCCCGCCATTC       | GAATTCTGCTGGGCCTTTGCT     |
| ZNF384    | GAGCTGTGGGAGGCTTTGTG       | CCACAGTCAGATGCCGGAC       | CTCCACCCCTGTCTCTAGC       |
| GTPBP1    | AGGGTGGGGTTGGATCTGTG       | CTACAGCCCTCCAGCTAAACA     | ACACCAGCCCTTTTGTAGTGGA    |
| CLN5      | AAGGCTAAGTGATCTTTCTCTGGCT  | TAATGAAGTCAGGTCTTGAACCCCG | TCTGCTGACTGAATTGGATGCACTA |
| HLA-DQB1  | TTGGGGTGTGAAGTAAGGGTGG     | TGGCCTTAGAATATCCAGCCTC    | CTCTTCTGGTTTGGTGAGTGCTG   |
| CDK11B    | CCCATCGACCCCTCCATGTT       | AGACGGGCTTCCACCTTACC      | AAGGTCAGAGTGGACCCCGT      |
| HBG2      | GAGAAACCCUGGAAGGCUC        | CTTCAAGCTCCTGGGAAATG      | CCTGGCAGAAGATGGTGACT      |
| Kanamycin | CCAUUCUCACCGGAUUCAGU       | GATGTTGGACGAGTCGGAAT      | CTGCCTCGGTGAGTTTTCTC      |

## REFERENCES

- (1) Hardenbol, P.; Yu, F.; Belmont, J.; Mackenzie, J.; Bruckner, C.; Brundage, T.; Boudreau, A.; Chow, S.; Eberle, J.; Erbilgin, A.; Falkowski, M.; Fitzgerald, R.; Ghose, S.; Iartchouk, O.; Jain, M.; Karlin-Neumann, G.; Lu, X.; Miao, X.; Moore, B.; Moorhead, M.; Namsaraev, E.; Pasternak, S.; Prakash, E.; Tran, K.; Wang, Z.; Jones, H. B.; Davis, R. W.; Willis, T. D.; Gibbs, R. A. *Genome research* **2005**, *15*, 269.
- (2) Fu, G. K.; Hu, J.; Wang, P. H.; Fodor, S. P. *Proceedings of the National Academy of Sciences of the United States of America* **2011**, *108*, 9026.
- (3) Li, H.; Durbin, R. *Bioinformatics* **2009**, *25*, 1754.
- (4) Langmead, B.; Salzberg, S. L. *Nature methods* **2012**, *9*, 357.
- (5) Mortazavi, A.; Williams, B. A.; McCue, K.; Schaeffer, L.; Wold, B. *Nature methods* **2008**, *5*, 621.
- (6) Fu, G. K.; Xu, W.; Wilhelmy, J.; Mindrinos, M. N.; Davis, R. W.; Xiao, W.; Fodor, S. P. A. *Proceedings of the National Academy of Sciences of the United States of America* **2014**, DOI:10.1073/pnas.1323732111.
